# Supplementary material for: Tissue-Specific Metabolic Profiling of Mungbean (Vigna radiata L.) Genotypes with Different Seed Coat Colors
Source: Hindawi journal article supplement (doi:10.1155/2023/7555915), 2023-02-11
Supplement: f1 [file 7555915.f1.zip]

Archive with 4 entries (4 files):
- Supplementary Materials figure S1 (1).docx
- Supplementary Materials figure S2 (1).docx
- Supplementary Materials Table S1 (1).docx
- Supplementary Materials Table S2 (1).docx
