# Supplementary material for: Tissue-Specific Metabolic Profiling of Mungbean (Vigna radiata L.) Genotypes with Different Seed Coat Colors
Source: Hindawi journal article supplement (doi:10.1155/2023/7555915), 2023-02-11
Supplement: f1 [file 7555915.f1.zip › Supplementary Materials figure S1 (1).docx]

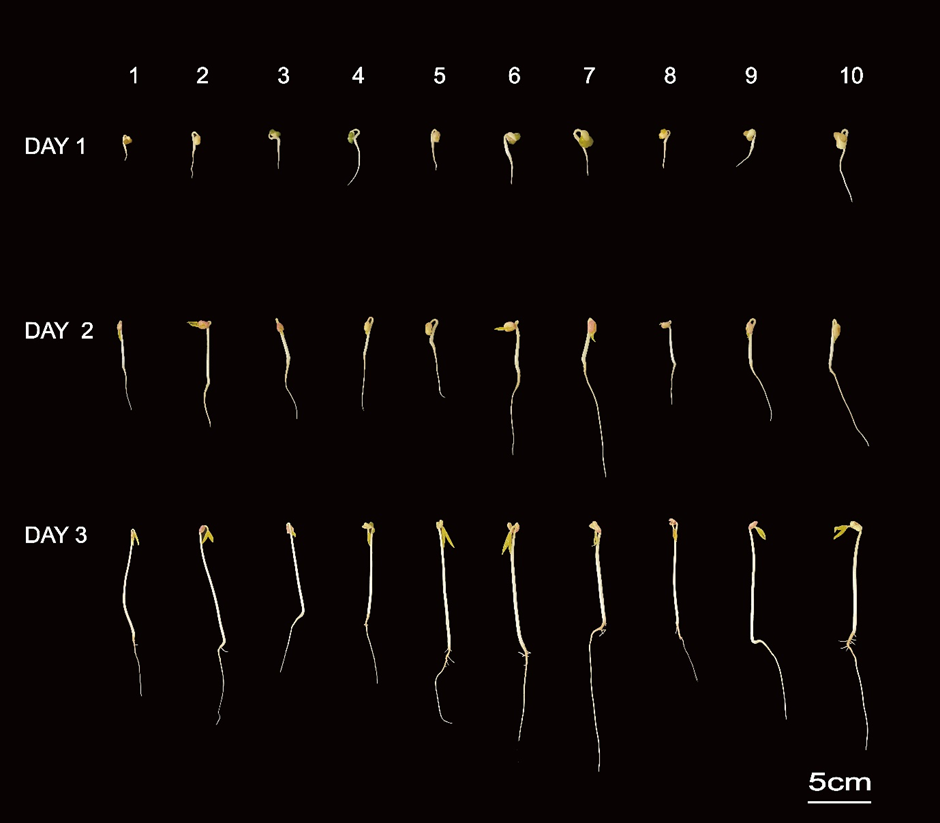


**Figure S1:** Phenotypic traits of 10 mungbean genotypes.

The number at the top of this figure indicates the mung bean genotype (1-Damyang, Jeollanam-do-1994 3231, 2-Tecer-Hitam, 3-JP229177, 4-JP103138-2, 5-Vo1301, 6-V03720B-G, 7-JP229099, 8-Vo5551, 9-Yellowgram ,10-V01946A-Y).
