# Supplementary material for: Tissue-Specific Metabolic Profiling of Mungbean (Vigna radiata L.) Genotypes with Different Seed Coat Colors
Source: Hindawi journal article supplement (doi:10.1155/2023/7555915), 2023-02-11
Supplement: f1 [file 7555915.f1.zip › Supplementary Materials figure S2 (1).docx]

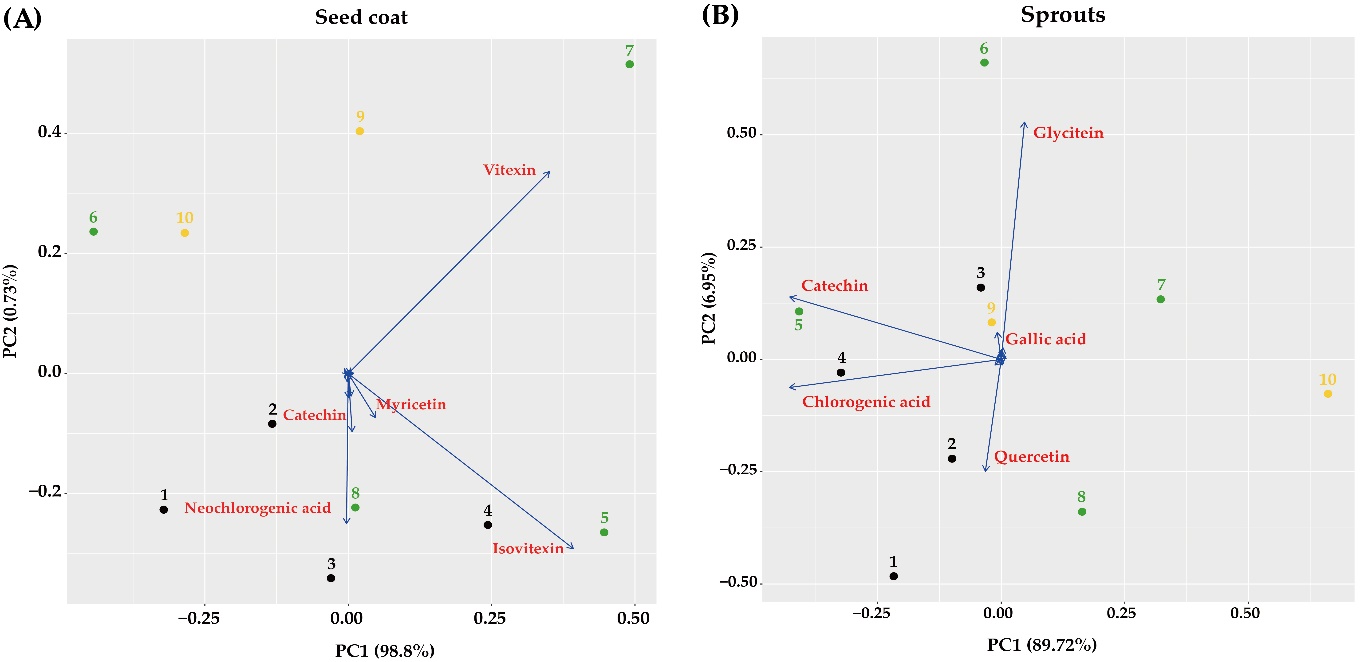


**Figure S2:** PCA analysis on the 10 genotypes of mungbean sprouts and seed coat.

The 10 mungbean genotypes were clustered according to the contents of 21 secondary metabolites. Each genotype is marked according to the color of the seed coat (black, green and yellow). The major five secondary metabolites seed coat : (Catechin, Isovitexin, Myricetin, Neochlorogenic acid and Vitexin) sprouts : (Catechin, Chlorogenic acid, Gallic acid, Glycitein and Quercetin) were indicated by arrows respectively. The length of arrow represents the effect of each compound on clustering.
