# Supplementary material for: Tissue-Specific Metabolic Profiling of Mungbean (Vigna radiata L.) Genotypes with Different Seed Coat Colors
Source: Hindawi journal article supplement (doi:10.1155/2023/7555915), 2023-02-11
Supplement: f1 [file 7555915.f1.zip › Supplementary Materials Table S1 (1).docx]

**Table S1:** Metabolic profiling of seed coats of ten mungbean genotypes.

concentration of metabolites (mg/100g DW)

|  | Damyang,Jeollanam-do-1994 323 | Tecer-Hitam | JP229177 | JP103138-2 | Vo1301 | V03720B-G | JP229099 | Vo5551 | Yellowgram | V01946A-Y |
| --- | --- | --- | --- | --- | --- | --- | --- | --- | --- | --- |
| Biochanin A | ND | ND | ND | ND | 1.36±0.18a | ND | ND | ND | ND | ND |
| Caffeic acid | 42.4±0.4b | 39.38±0.05c | 33.3±0.34f | 36.16±0.7e | 52.3±0.55a | 33.85±0.2f | 41.99±0.15b | 42.42±0.14b | 37.4±0.13d | 37.63±0.17d |
| Catechin | ND | 202.16±2.81b | 126.19±0.79c | 407.87±11.26a | 114.98±1.03c | ND | 98.25±1.9d | 110.54±1.06d | ND | ND |
| Daidzein | 20.01±0.06i | 23.48±0.14f | 22.01±0.49g | 24.29±0.18e | 31.47±0.15a | 25.45±0.2d | 30±0.18b | 21.44±0.19h | 24.53±0.16e | 26±0.42c |
| Daidzin | 71.02±0.65f | 67.95±0.67g | 83.72±2.85e | 119.5±1.16a | 114.59±1.31b | 34.4±0.15i | 87.67±2.1d | 105.39±1.4c | 70.36±0.92fg | 55.95±0.46h |
| Gallic acid | 43.49±0.64c | 20.2±0.16e | 47.71±0.53b | 28.03±.81d | 11.33±1.93f | ND | 8.14±0.18g | 49.48±0.88a | 7.52±0.06g | ND |
| Genistin | 0.3±0.02cd | 0.35±0.04cd | 4.66±0.57a | 4.34±0.22a | 3.47±0.17b | ND | 0.6±0.08c | ND | ND | ND |
| Glycitin | 8.87±0.26f | 14.06±0.35e | 24.74±1.86ab | 15.64±0.6e | 25.76±0.42a | 4.49±0.32g | 24.18±0.91ab | 21.91±0.23c | 18.2±0.86d | 23.45±0.62bc |
| Isovitexin | 5428.2±19.5g | 6325.88±23.47f | 6999.12±30.45e | 8357.78±94.46c | 9572.42±25.19a | 4613.38±50.36h | 9451.76±72.72b | 7183.96±38.1d | 7028.53±7.5e | 5468.39±17.63g |
| Myricetin | 454.93±2.03h | 567.01±1.28f | 780.69±3.49d | 1031.82±3.26a | 923.39±1.76c | 448.08±3.37h | 999.26±9.46b | 591.41±2.16e | 583.98±3.01e | 509.81±3.57g |
| Neochlorogenic acid | 198.66±0.7d | 267.76±0.76b | 206.21±0.81c | 196.13±0.38e | 61.97±1.36f | 21.26±0.15g | ND | 284.52±2a | 2.1±0.05h | ND |
| p-Coumaric acid | 1.96±0.11i | 7.98±0.17e | 7.5±0.19ef | 35.47±0.48a | 14.51±0.32b | 8.66±0.14d | 11.03±0.17c | 6.16±0.15g | 3.63±0.16h | 7.02±0.23f |
| Quercetin | ND | ND | ND | 100.07±0.08c | 100.67±0.19b | ND | 101.85±0.01a | ND | ND | ND |
| Resveratrol | 17.66±0.05c | 17.66±0.19c | 17.54±0.12c | 19.22±0.19b | 15.07±0.02f | 15.86±0.16e | 20.54±0.11a | 20.56±0.22a | 19.05±0.04b | 16.58±0.15d |
| Syringic acid | 40.67±3.8b | 64.5±8.37a | ND | ND | ND | ND | ND | ND | ND | ND |
| Vitexin | 4216.8±27.89i | 5236.98±39.74g | 5553.57±74.01f | 6946.99±101.08c | 7782.34±44.54b | 3812.76±71.15j | 8390.86±96.96a | 5842.31±52.21e | 6087.98 ±36.69d | 4551.03±26.74h |
| cyanidin 3-O-glucoside | 14.91±0.05h | 24.48±0.42e | 38.61±0.37c | 40.37±1.51b | 44.80±0.87a | 28.61±0.19d | 18.85±0.16g | 20.92±0.51f | 19.49±0.14g | 14.72±0.36h |
| pelragonidin-3-O-glucoside | 79.64±2.27f | 125.18±4.28e | 212.22±16.83c | 205.21±13.76c | 193.90±14.86c | 107.58±0.04e | 286.93±10.35a | 240.23±6.67b | 297.59±8.79a | 170.28±6.38d |
