# Supplementary material for: Tissue-Specific Metabolic Profiling of Mungbean (Vigna radiata L.) Genotypes with Different Seed Coat Colors
Source: Hindawi journal article supplement (doi:10.1155/2023/7555915), 2023-02-11
Supplement: f1 [file 7555915.f1.zip › Supplementary Materials Table S2 (1).docx]

**Table S2:** Metabolic profiling of sprouts of ten mungbean genotypes.

concentration of metabolites (mg/100g DW)

|  | Damyang,Jeollanam-do-1994 3231 | Tecer-Hitam | JP229177 | JP103138-2 | Vo1301 | V03720B-G | JP229099 | Vo5551 | Yellowgram | V01946A-Y |
| --- | --- | --- | --- | --- | --- | --- | --- | --- | --- | --- |
| Biochanin A | 1.6±0.11b | 1.43±0.09b | ND | ND | ND | ND | ND | 2.78±0.43a | ND | 0.81±0.13c |
| Caffeic acid | 31.02±0.07e | 26.19±0.19g | 33.54±0.25c | 36.01±0.07b | 28.41±0.14f | 30.73±0.47e | 46.94±0.35a | 36.29±0.04b | 32.56±0.25cd | 31.66±1.31de |
| Catechin | 1192.99±5.67c | 1163.34±6.36d | 1134.76±7.08e | 1366.38±14.84b | 1415.34±15.99a | 1139.07±1.31e | 807.33±5.37h | 910.98±13.58g | 1103.49±7.13f | 519.79±2.45i |
| Chlorogenic acid | 1397.05±1.61b | 1236.03±6.34c | 1182.76±1.39d | 1415.37±9.72b | 1520.13±13.42a | 1186.89±2.31d | 901.29±5.92f | 1043.59±35.85e | 1173.89±7.77d | 613.73±2.08g |
| Coumestrol | 15.22±0.34h | 21.72±0.28e | 8.82±0.25i | 23.02±0.1d | 15.57±0.26h | 24.05±0.61c | 30.87±0.26b | 17.16±0.31g | 19.13±0.32f | 37.62±0.62a |
| Daidzein | 56.99±0.05b | 45.67±0.32h | 48.13±0.15g | 58.72±0.24a | 38.47±0.14i | 54.89±0.18c | 49.73±0.12ef | 53.99±0.18d | 50±0.29e | 49.49±0.26f |
| Daidzin | 66.47±0.71f | 105.21±1.64d | 63±0.77f | 199.59±2.34a | 56.92±2.4g | 111.01±1.56c | 64.99±1.12f | 78.51±1.42e | 64.02±0.7f | 128.88±3.94b |
| Gallic acid | 63.51±1.76i | 88.24±0.57g | 126.7±0.26b | 131.51±2.72a | 106.77±0.22e | 96.6±0.88f | 111.44±2.89d | 90.22±0.88g | 117.47±0.28c | 83.36±1.76h |
| Genistein | ND | ND | ND | ND | ND | ND | ND | 18.43±0.94 | ND | ND |
| Genistin | 22.63±0.85bc | 21.67±0.73cd | 17.1±0.08f | 20.63±0.56d | 17.39±0.45f | 23.62±0.42b | 19.03±0.2e | 27.4±0.68a | 22.08±0.1c | 21.43±0.98cd |
| Glycitein | ND | 81.48±1.93g | 171.74±2.55d | 117.61±0.38f | 119.23±1.44f | 362.99±1.45a | 214.6±1.08b | 81.13±2.57g | 149.99±2.05e | 178.32±0.99c |
| Isovitexin | 25.31±0.78cd | 22.51±0.75ef | 19.04±0.19g | 25.67±1.17c | 21.63±0.48f | 32.52±1.3b | 18.11±0.64g | 14.83±0.85h | 38.96±0.98a | 23.73±0.71de |
| Myricetin | 161.99±0.31d | 163.23±0.1c | 157.62±0.44g | 160.11±0.14e | 160.89±0.24e | 164.16±0.64b | 163.47±0.27 | 158.45±0.2f | 165.32±0.69a | 163.42±0.28bc |
| Neochlorogenic acid | 42.24±1.96c | 29.75±0.46e | 34.71±0.41d | 44.91±1.05b | 33.46±0.39d | 43.87±1.12bc | 34.04±0.51d | 48.64±1.29a | 28.65±1.42e | 41.83±0.94c |
| p-Coumaric acid | 22.89±0.31de | 22.9±0.38de | 18.33±0.29f | 57.02±0.65a | 18.33±0.25f | 26.69±0.41c | 29.57±0.59b | 22.11±0.36e | 18.89±0.08f | 24.28±2.38d |
| Quercetin | 117.09±0.5a | 111.03±1.23b | ND | 117.28±0.85a | ND | ND | ND | 111.86±0.34b | ND | ND |
| Resveratrol | 13.19±0.18f | ND | 13.55±0.06e | ND | 12.21±0.05g | 27.51±0.22a | 14.07±0.07d | 13.86±0.09d | 15.04±0.04b | 14.47±0.07c |
| t-Ferulic acid | 1.16±0.14f | 0.41±0.14g | ND | 22.89±0.14a | 4.66±0.34e | 14.93±0.11b | 11.57±0.3c | 1.04±0.1f | 8.03±0.19d | 11.56±0.36c |
| Vitexin | 107.99±1a | 70.4±1.89e | 63.99±0.57f | 81.26±1.1d | 40.04±1.56h | 86.78±2.61c | 42.92±1.08h | 51.8±1.72g | 93.92±2.26b | 54.82±1.02g |
